# Supplementary material for: A quantitative pipeline to assess secretion of human leptin coding variants reveals mechanisms underlying leptin deficiencies
Source: PubMed Central journal article supplement (PMC11366920; doi:10.1016/j.jbc.2024.107562), 2024-07-19

Supplemental Figure 1

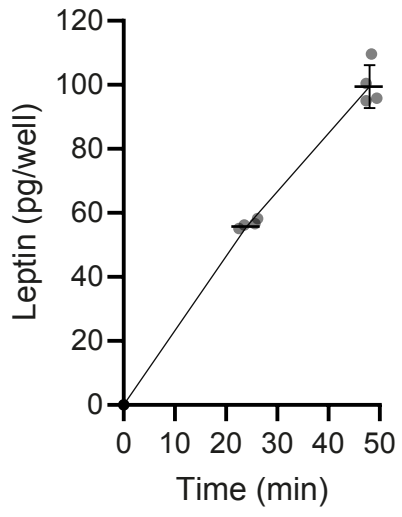

Supplement: mmc1.pdf [file mmc1.pdf]
