# Supplementary material for: A quantitative pipeline to assess secretion of human leptin coding variants reveals mechanisms underlying leptin deficiencies
Source: PubMed Central journal article supplement (PMC11366920; doi:10.1016/j.jbc.2024.107562), 2024-07-19

Supplemental Figure 2

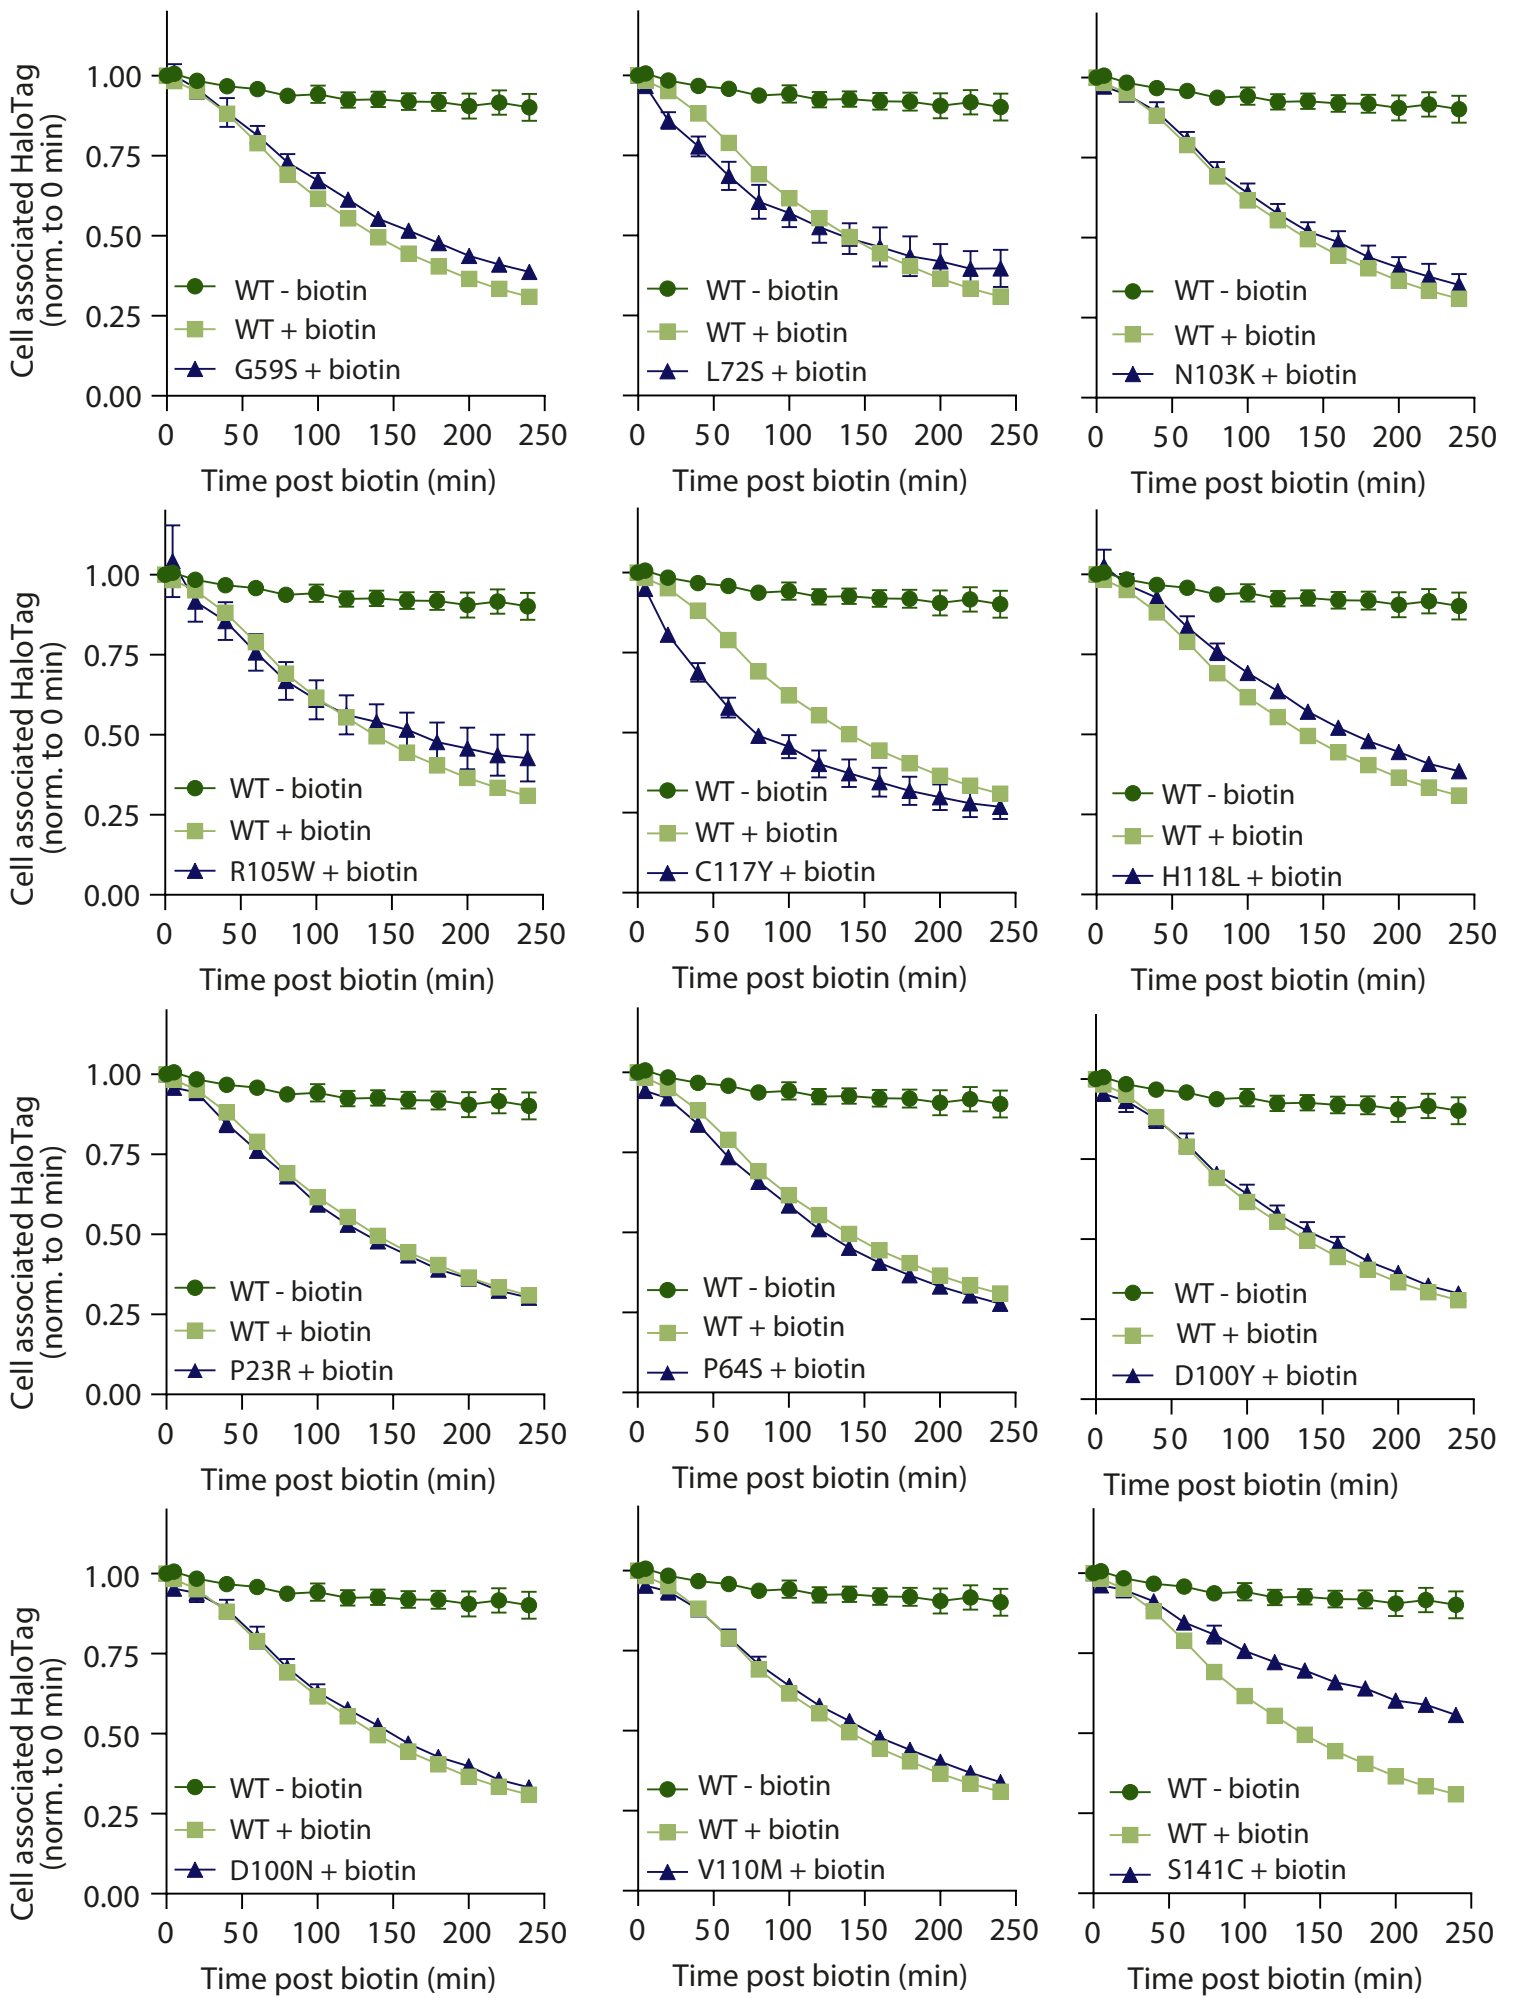

Supplement: mmc2.pdf [file mmc2.pdf]
