# Supplementary material for: A quantitative pipeline to assess secretion of human leptin coding variants reveals mechanisms underlying leptin deficiencies
Source: PubMed Central journal article supplement (PMC11366920; doi:10.1016/j.jbc.2024.107562), 2024-07-19

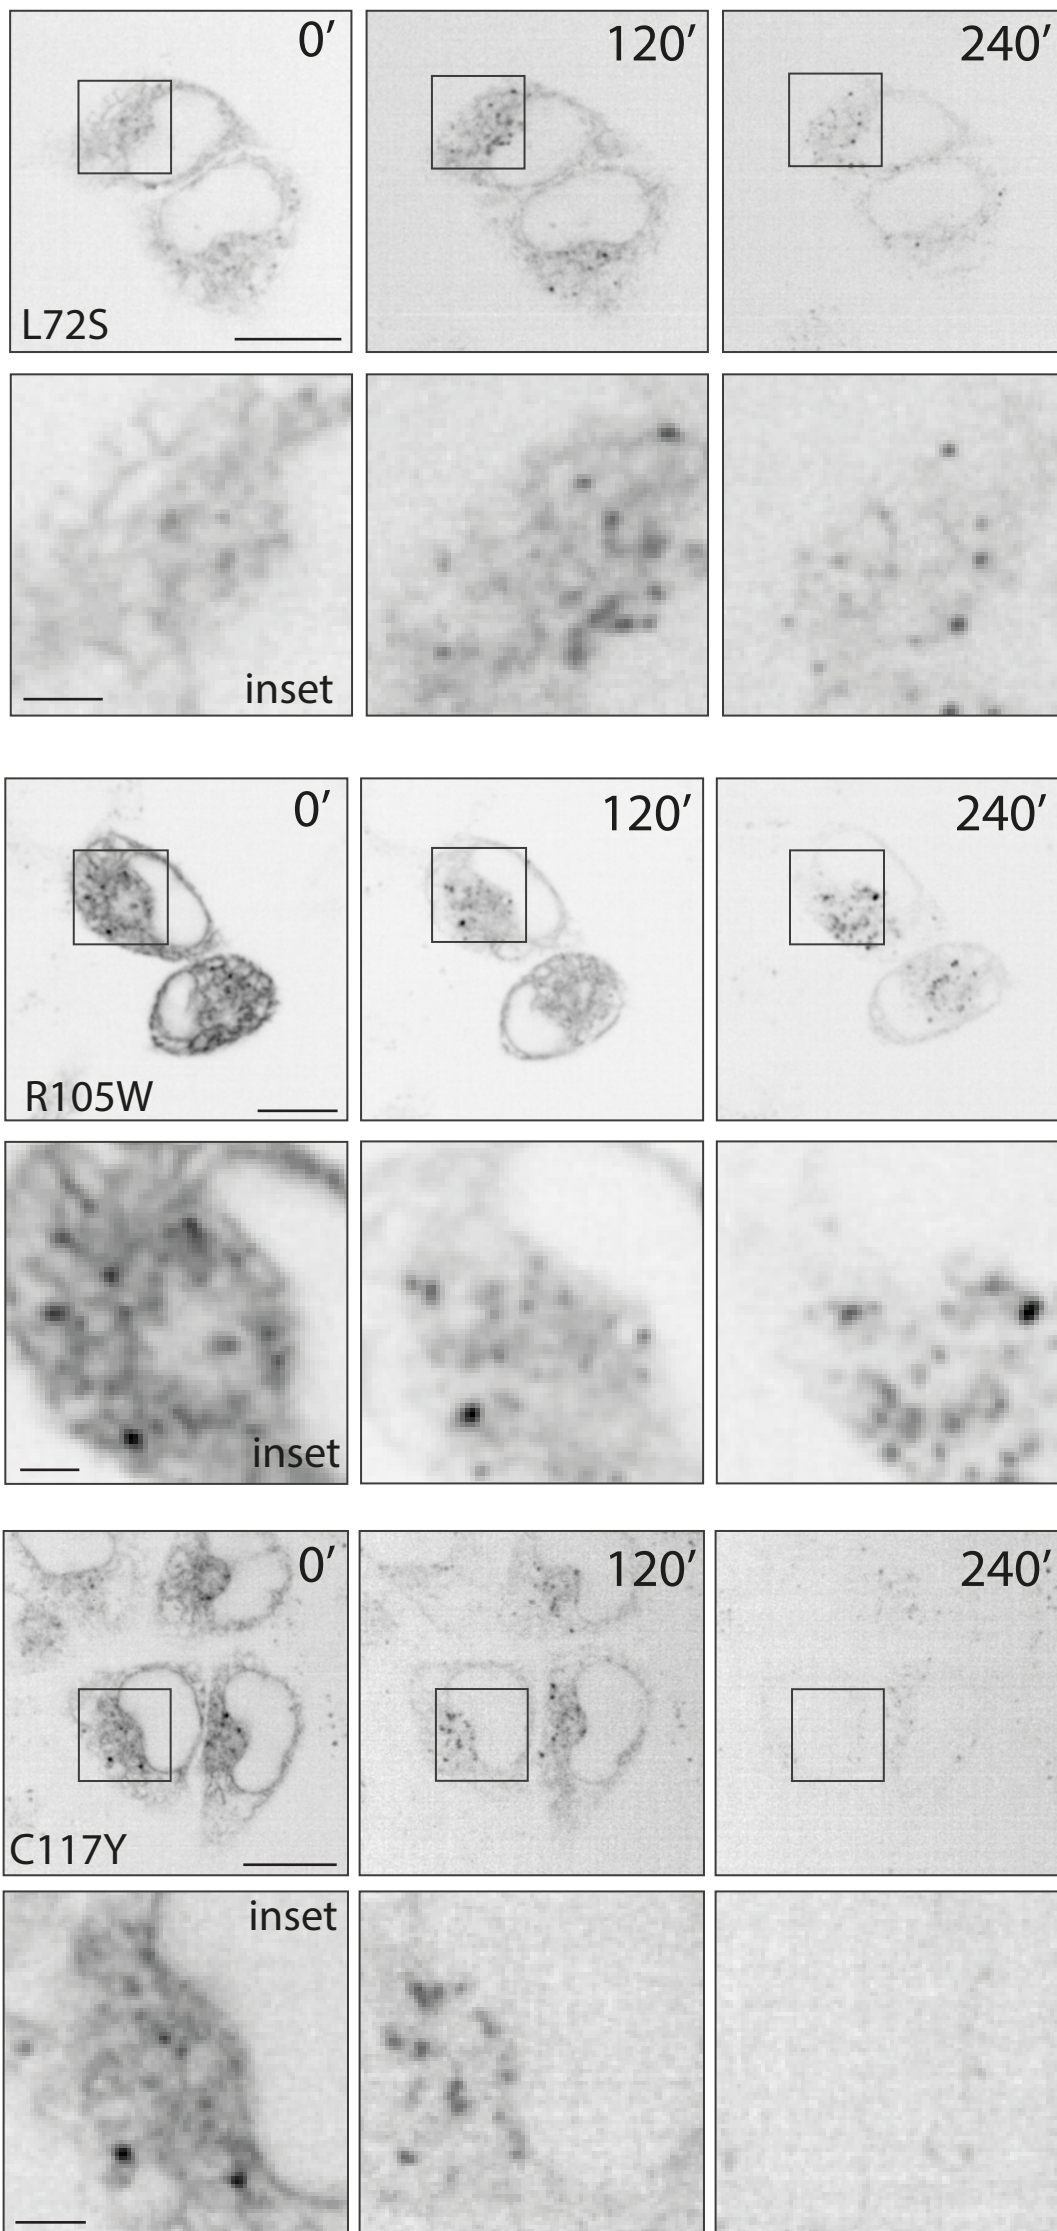

Supplement: mmc3.pdf [file mmc3.pdf]
